# Supplementary material
Source: PubMed Central journal article supplement (PMC6819116)
Supplement: jci-129-126108-s349.pdf [file jci-129-126108-s349.pdf]

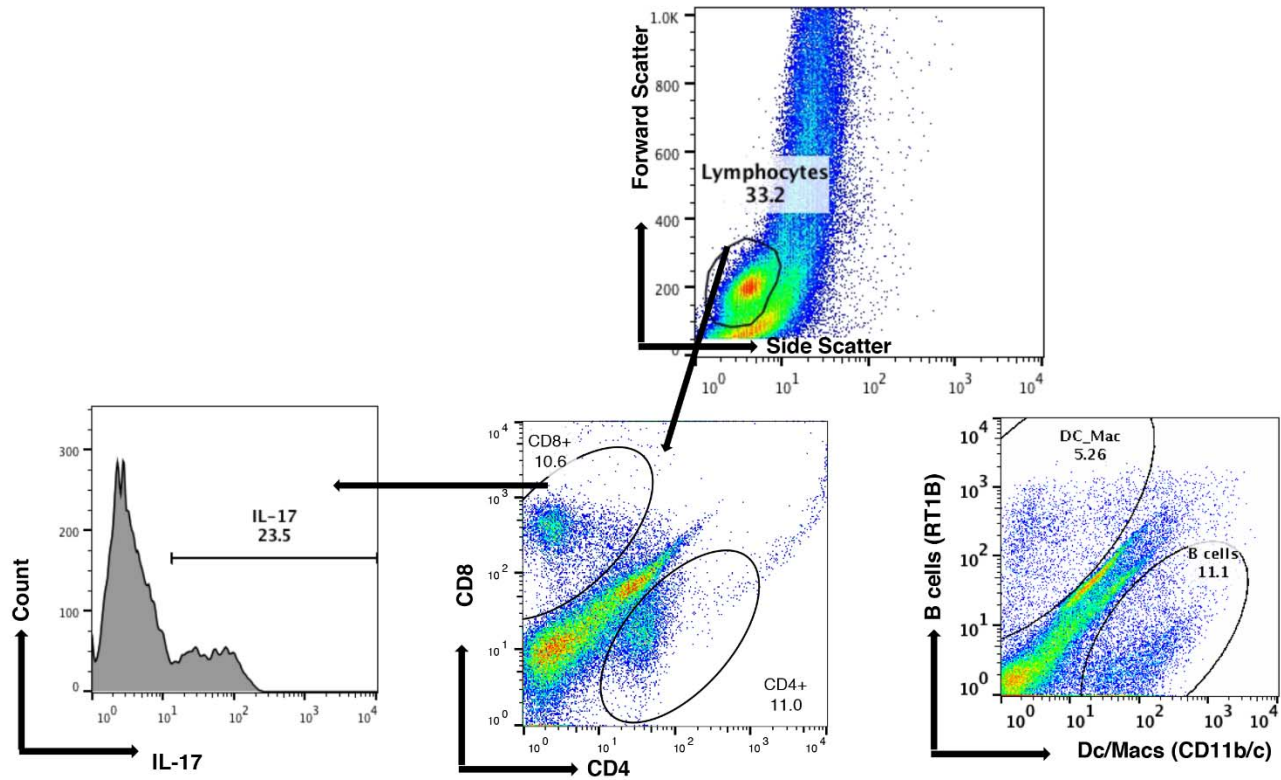

**Supplemental Figure 1. A) Gating strategies for the phenotypic analysis of infiltrating immune cells in the kidney.** Lymphocyte gating is based on the forward scatter vs side scatter, which is further gated on CD4+ or CD8+ T cells or B-cells or DC/M $\phi$ . These populations were analyzed further based on IL-17 or Orai1 expression as described in text. B) Expression of Orai1 and Orai1+/IL17+ cells in CD8, B cells, NK cells and macrophages.

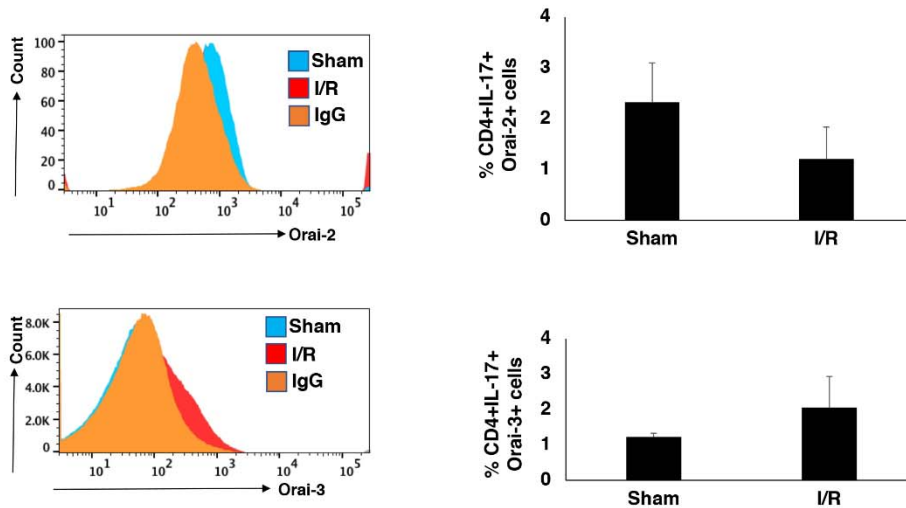

**Supplemental Figure 2. Orai2 and Orai3 expression in kidney lymphocytes following renal I/R injury.** A) Representative histogram of Orai2+ lymphocytes (left panel) and percent CD4+/Orai2+ cells in kidney 2 days following sham or I/R injury. B) Representative histogram of Orai3+ lymphocytes (left panel) and percent CD4+/Orai3+ cells in kidney 2 days following sham or I/R injury. Data are mean  $\pm$  SE from a minimum of 3 independent rats per group; no statistical differences were observed between sham and I/R.

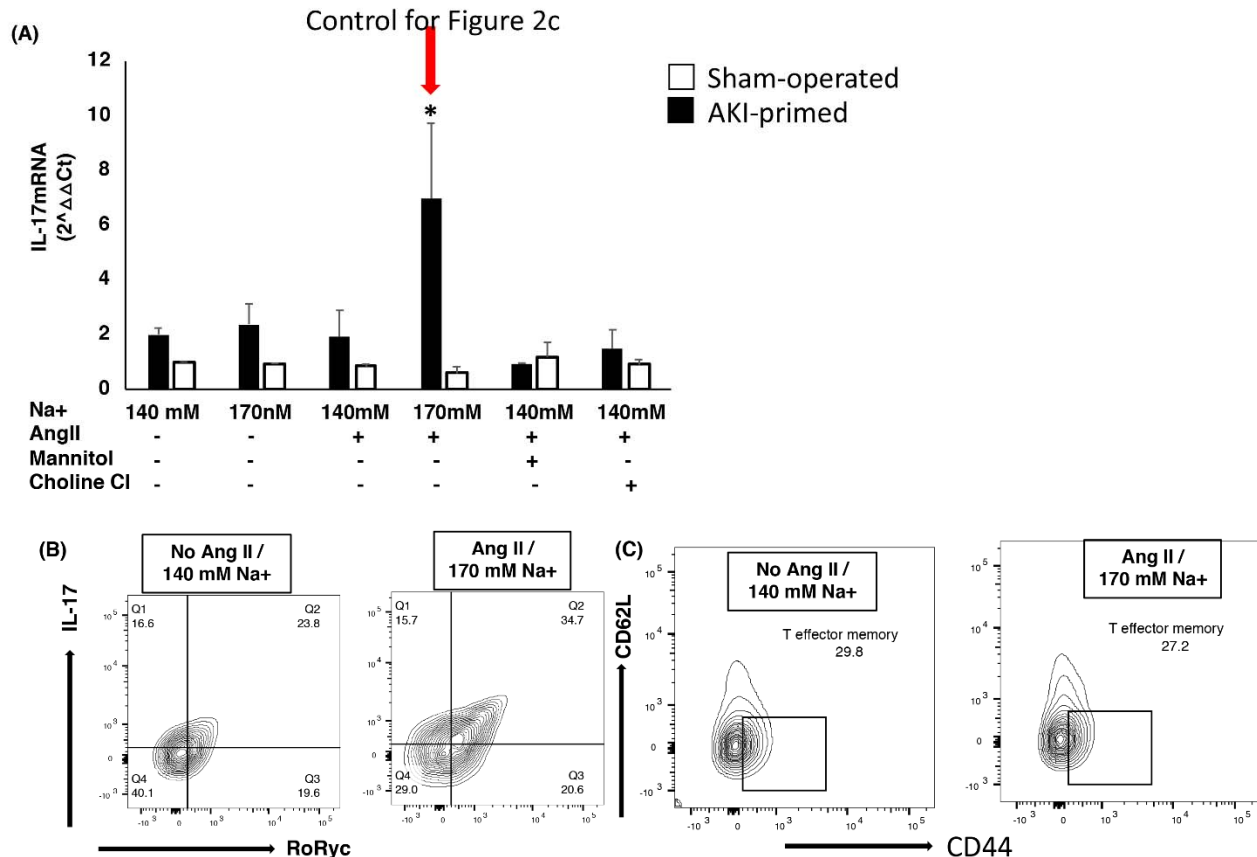

**Supplemental Figure 3. Characterization of the cells used for in vitro stimulation following AKI priming.** A) Representative FACS analysis of ROR $\gamma$ T staining in CD4<sup>+</sup> cells isolated 7 days following sham or I/R surgery. B) Renal injury primes IL17 mRNA response in kidney derived CD4<sup>+</sup> cells. Renal CD4 cells were isolated from kidney 7 days following sham (open bar) or I/R surgery (black bar). Cells were incubated for 12-14 hours in media containing either 140 or 170 mM Na<sup>+</sup> with or without Ang II ( $10^{-7}$ M) as shown. To control for supplementation of NaCl to the media, some samples were stimulated with equimolar mannitol (60 mM) or choline chloride (30 mM) as shown. IL17 mRNA is expressed as  $2^{-\Delta\Delta Ct}$  and is mean  $\pm$  SE from a minimum of 3 independent rats per group; \* indicates  $P < 0.05$  vs control (i.e., 140 mM Na<sup>+</sup>, no added Ang II), by one-ANOVA and Tukey's post-hoc test. Note the response of AKI primed cells with Ang II and added Na<sup>+</sup> indicated by the arrow represent the control condition used in Figure 2C. C) Representative contour plots indicating the co-expression of IL17 with ROR $\gamma$ T (RoRyc) in CD4<sup>+</sup> cells from post-AKI rat kidney under control conditions and following stimulation with Ang II and elevated Na. D) Representative FACS analysis of CD4<sup>+</sup> cells from post-IR rat kidney illustrating central memory T cells (CD44<sup>+</sup>CD62L<sup>-</sup>) before and after in vitro stimulation.

(A)

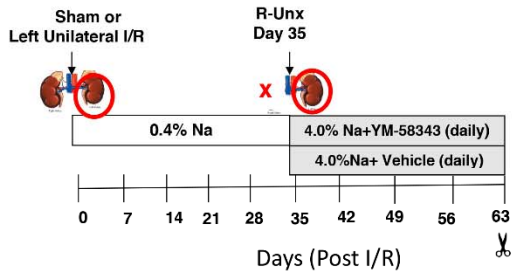

(B)

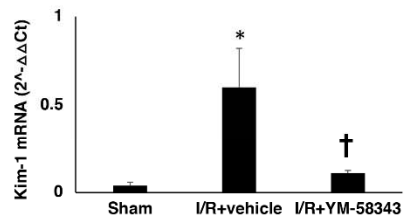

**Supplemental Figure 4.** A) Schematic outline of timeline to investigate the role of SOCE in progression of CKD following acute I/R injury. B) Renal Kim-1 expression measured in sham, I/R vehicle and YM 58483 is shown.

**Supplemental Table 1a. Antibodies utilized for flow cytometry for rat studies**

| Name                               | Catalog    | Clone    | Source        |
|------------------------------------|------------|----------|---------------|
| Mouse anti-rat CD4 PE-Cy5          | 554839     | OX-35    | BD Pharmingen |
| Mouse anti-rat CD8 Alexa fluor 647 | 561611     | OX-8     | BD Pharmingen |
| IL-17A monoclonal antibody FITC    | 11-7177-80 | Ebio17b7 | ebiosciences  |
| Mouse anti-rat IFN- $\gamma$ FITC  | 559498     | DB-1     | BD Pharmingen |
| PE mouse anti-rat IL-4             | 555082     | OX-81    | BD Pharmingen |
| FITC Mouse Anti-Rat RT1B           | 554928     | OX-6     | BD Pharmingen |
| FITC Mouse Anti-Rat CD11b/c        | 554862     | OX-42    | BD Pharmingen |
| Anti-Orai-1                        | ACC-062    | Peptide  | Alomone Lab   |
| Anti-rat CD44 APC                  | FAB6577A   | 740017   | RnD Biosystem |
| Anti-Orai-2                        | ACC-061    | Peptide  | Alomone Lab   |
| Anti-Orai-3                        | ACC-065    | Peptide  | Alomone Lab   |
| Anti-RoRyc                         | 562607     | Q31-378  | BD Pharmingen |

**Supplemental Table 1b. Antibodies utilized for flow cytometry for human studies**

| Name           | Catalog | Clone   | Source       |
|----------------|---------|---------|--------------|
| Anti-IL-17 PE  | 512306  | BL168   | Biolegend    |
| Anti-CD4 PerCp | 317432  | OKT4    | Biolegend    |
| FITC orai-1    | ACC-060 | Peptide | Alomone Labs |

**Supplemental Table 2:** Percent of Orai1 expression in different leukocyte populations in kidney following sham and I/R injury.

|         | %Orai1+ cells |            |
|---------|---------------|------------|
|         | Sham          | I/R        |
| CD4     | 27.1±9.8      | 77.9±15.3* |
| CD8     | 0.85±0.01     | 0.59±0.02  |
| B cells | 0.98±0.48     | 1.47±0.35  |
| CD11b/c | 3.2±0.7       | 5.5±0.65   |

\* indicates  $P < 0.05$  I/R vs sham by Student's t-test.
